# Supplementary material for: MRI Types of Cerebral Small Vessel Disease and Circulating Markers of Vascular Wall Damage
Source: PubMed Central journal article supplement (PMC7345277; doi:10.3390/diagnostics10060354), 2020-05-29
Supplement: diagnostics-10-00354-s001.pdf [file diagnostics-10-00354-s001.pdf]

**Table S1.** Severity of WMH in the examined brain regions in patients with cSVD.

| WMH, location                                | Severity on a 4-point scale |            |            |            |
|----------------------------------------------|-----------------------------|------------|------------|------------|
|                                              | 1 (n, %)                    | 2 (n, %)   | 3 (n, %)   | 4 (n, %)   |
| WMH in basal ganglia                         | 48 (50%)                    | 27 (28.1%) | 15 (15.6%) | 6 (6.3%)   |
| WMH in the anterior region of frontal lobes  |                             |            |            |            |
| pWMH                                         | 4 (4.2%)                    | 43 (44.8%) | 34 (35.4%) | 15 (15.6%) |
| dWMH                                         | 1 (1%)                      | 38 (39.6%) | 42 (43.8%) | 15 (15.6%) |
| jWMH                                         | 36 (37.5%)                  | 24 (25%)   | 17 (17.7%) | 19 (19.8%) |
| WMH in the posterior region of frontal lobes |                             |            |            |            |
| pWMH                                         | 9 (9.4%)                    | 47 (49%)   | 24 (25%)   | 16 (16.7%) |
| dWMH                                         | 0                           | 30 (31.3%) | 37 (38.5%) | 29 (30.2%) |
| jWMH                                         | 39 (40.6%)                  | 25 (26%)   | 9 (9.4%)   | 23 (24%)   |
| WMH in the parietal lobes                    |                             |            |            |            |
| pWMH                                         | 20 (20.8%)                  | 32 (33.3%) | 20 (20.8%) | 24 (25%)   |
| dWMH                                         | 2 (2.1%)                    | 27 (28.1%) | 33 (34.4%) | 34 (35.4%) |
| jWMH                                         | 46 (47.9%)                  | 24 (25%)   | 11 (11.5%) | 15 (15.6%) |
| WMH in the temporal lobes                    |                             |            |            |            |
| pWMH                                         | 59 (61.5%)                  | 23 (24%)   | 13 (13.5%) | 1 (1%)     |
| dWMH                                         | 13 (13.5%)                  | 49 (51%)   | 34 (35.4%) | 0          |
| jWMH                                         | 52 (54.2%)                  | 24 (25%)   | 12 (12.5%) | 8 (8.3%)   |
| WMH in the occipital lobes                   |                             |            |            |            |
| pWMH                                         | 49 (51%)                    | 36 (37.5%) | 11 (11.5%) | 0          |
| dWMH                                         | 50 (52.1%)                  | 36 (37.5%) | 10 (10.4%) | 0          |
| jWMH                                         | 83 (86.5%)                  | 12 (12.5)  | 1 (1%)     | 0          |

pWMH, periventricular WMH; dWMH, deep WMH; jWMH, juxtacortical WMH

**Table S2.** Location and severity of lacunes in patients with cSVD.

| Location              | None       | Up to 5    | From 5 to 10 | More than 10 |
|-----------------------|------------|------------|--------------|--------------|
| Cerebral white matter | 54 (56.3%) | 16 (16.7%) | 9 (9.4%)     | 17 (17.7%)   |
| Basal ganglia         | 64 (66.7%) | 11 (11.5%) | 9 (9.4%)     | 12 (12.5%)   |
| Brainstem             | 69 (71.9%) | 19 (19.8%) | 8 (8.3%)     | 0            |
| Cerebellum            | 78 (81.3%) | 10 (10.4%) | 5 (5.2%)     | 3 (3.1%)     |

**Table S3.** Location and severity of cerebral microbleeds in patients with cSVD.

| Microbleeds                                   | None       | Up to 5    | From 5 to 10 | More than 10 |
|-----------------------------------------------|------------|------------|--------------|--------------|
| Basal ganglia                                 | 68 (70.8%) | 12 (12.5%) | 5 (5.2%)     | 11 (11.5%)   |
| WMH in the anterior region of frontal lobes:  |            |            |              |              |
| pWMH                                          | 96 (100%)  | 0          | 0            | 0            |
| dWMH                                          | 92 (95.8%) | 4 (4.2%)   | 0            | 0            |
| jWMH                                          | 75 (78.1%) | 12 (12.5%) | 5 (5.2%)     | 4 (4.2%)     |
| WMH in the posterior region of frontal lobes: |            |            |              |              |

|                             |            |            |          |            |
|-----------------------------|------------|------------|----------|------------|
| pWMH                        | 95 (99%)   | 1 (1%)     | 0        | 0          |
| dWMH                        | 86 (89.6%) | 9 (9.4%)   | 1 (1%)   | 0          |
| jWMH                        | 77 (80.2%) | 13 (13.5%) | 1 (1%)   | 5 (5.2%)   |
| WMH in the parietal lobes:  |            |            |          |            |
| pWMH                        | 95 (99%)   | 1 (1%)     | 0        | 0          |
| dWMH                        | 92 (95.8%) | 3 (3.1%)   | 1 (1%)   | 0          |
| jWMH                        | 75 (78.1%) | 8 (8.3%)   | 2 (2.1%) | 11 (11.5%) |
| WMH in the temporal lobes:  |            |            |          |            |
| pWMH                        | 96 (100%)  | 0          | 0        | 0          |
| dWMH                        | 95 (99%)   | 1 (1%)     | 0        | 0          |
| jWMH                        | 72 (75%)   | 12 (12.5%) | 2 (2.1%) | 10 (10.4%) |
| WMH in the occipital lobes: |            |            |          |            |
| pWMH                        | 96 (100%)  | 0          | 0        | 0          |
| dWMH                        | 96 (100%)  | 0          | 0        | 0          |
| jWMH                        | 79 (82.3%) | 11 (11.5%) | 4 (4.2%) | 2 (2.1%)   |

pWMH, periventricular WMH; dWMH, deep WMH; jWMH, juxtacortical WMH

**Table S4.** Widening of subarachnoid spaces in the examined brain regions of patients with cSVD.

| <b>Brain regions</b>                  | <b>No widening</b> | <b>Mild widening</b> | <b>Moderate widening</b> | <b>Severe widening</b> |
|---------------------------------------|--------------------|----------------------|--------------------------|------------------------|
| Anterior region of the frontal lobes  | 39 (40.6%)         | 51 (53.1%)           | 6 (6.3%)                 | 0                      |
| Posterior region of the frontal lobes | 47 (49%)           | 46 (47.9%)           | 3 (3.1%)                 | 0                      |
| Parietal lobes                        | 63 (65.6%)         | 33 (34.4%)           | 0                        | 0                      |
| Temporal lobes                        | 81 (84.3%)         | 15 (15.6%)           | 0                        | 0                      |
| Occipital lobes                       | 89 (92.7%)         | 7 (7.3%)             | 0                        | 0                      |
